# Supplementary material for: Projected changes in atmospheric moisture transport contributions associated with climate warming
Source: Research Square preprint supplement (doi:10.21203/rs.3.rs-1619494/v1), 2022-05-19
Supplement: Supplementary file 1 [file e8a50dc9cd061de3cc7b9588.docx]

Supplementary Information for

Projected changes in atmospheric moisture transport contributions associated with climate warming

**Section 1. Materials and Methodology**

**Section 1.1 Data description**

To obtain the FLEXPART-WRF outputs for our experiments during the historical and future periods (under three shared socioeconomic pathways, SSPs), two sets of input data were used: dynamical downscaled data (using the Weather Research and Forecasting, WRF-ARW, model) from CESM2 outputs and from ERA5 reanalysis (WRF-CESM2 and WRF-ERA5, respectively).

The CESM2 (Community Earth System Model Version 2)1 data were downloaded from the Earth System Grid Federation (ESGF2) and they were obtained for the native "gn" grid with a resolution of 0.9 x 1.25 (~1o) and presented as an output mesh with 288 × 192 longitude/latitude, 32 vertical levels (top level at 2.25 mb). To force the WRF-ARW model, all CESM2 climatic data were processed to create intermediate files (26 vertical levels) that were used as the initial and boundary conditions. The CESM2 data has been evaluated for representing jet streams and storm tracks, Northern Hemisphere (NH) stationary waves, global divergent circulation, annular modes, the North Atlantic Oscillation and NH winter blocking2. CESM2 ranks within the top 10% of CMIP class models with respect to many of these features2. CESM2 provides all the necessary variables to force WRF-ARW at a better resolution than other models that which have a resolution of approximately 250 km.

The shared socioeconomic pathways (SSPs) used in this research were SSP2-4.5, SSP3-7.0, and SSP5-8.53,4. They differ in several aspects: SSP2-4.5 represents the medium part of the future forcing pathway range, and it is an update of RCP4.5. It reflects a non-extreme use of the soil and aerosol pathways (radiative forcing of 4.5 W m-2 for 2100). SSP3-7.0 is the medium-to-high end of the future forcing pathway range, and it provides a scenario with both substantial land-use changes (in particular, decreased global forest cover) and high Near Term Climate Forcers (NTCF) emissions (particularly SO2) (radiative forcing of 7.0 Wm-2 for 2100). Finally, SSP5-8.5 is a scenario that represents emissions high enough to produce a radiative forcing of 8.5 W m-2 in 2100 under extreme conditions.

ERA55 is the most recent (5th generation) global atmospheric reanalysis of the European Centre for Medium-Range Weather Forecasts (ECMWF), and it was used to compare fields for the historical period of 2010–2014. WRF-ARW_ERA5 outputs were employed to force the FLEXPART-WRF model. These simulations corresponded to the control experiments for evaluating the configuration (see Section 1.4). The advantages of ERA5 are its high resolution (31 km horizontally and 137 vertical levels) and large number of assimilated historical observations. ERA5 significantly improves upon its predecessor, ERA-Interim reanalysis, particularly with respect to precipitation fields both over extratropical regions and tropical oceanic areas.

**Section 1.2 Experimental setup for WRF and FLEXPART-WRF**

The parameterisations employed in the WRF-ARW configuration were as follows: the WSM6 microphysics scheme6, Yonsei University planetary boundary layer (PBL) scheme7, revised MM5 surface layer scheme8, United Noah Land Surface Model9, shortwave and longwave RRTMG schemes10 and the Kain-Fritsch Ensemble cluster scheme11. Spectral nudging of waves longer than approximately 1000 km was employed to avoid distortion of the large-scale circulation within the regional model domain due to the interaction between the model solution and lateral boundary conditions12. The outputs had 40 vertical layers from the surface to 50 hPa with a horizontal spacing of 20 km and they covered an area of 115.39–42.02°W and 19.41oS–59.51°N (see Fig. 1). The criteria used to select these parameterisation schemes were that they had been evaluated and employed in several previous investigations involving the WRF-ARW domain13,14 (see Supplementary Fig. 1). For the WRF simulations, a 6-month spin-up was performed before the period to be simulated, and the restart mode was used when the WRF-ARW was stopped. Finally, the outputs of WRF-ARW had 40 vertical levels in sigma coordinates and 480 × 780 nodes in the output grid (~0.18o). The historical periods, mid-century and end of the century used were 2010-2014, 2049-2053 and 2096-2100, respectively. The initialization dates were July 1, 2009, 2048, and 2095, respectively.

For the FLEXPART-WRF15 configuration, we used Hanna's16 scheme for turbulence parameterisation with the convection scheme activated. This scheme is based on the boundary layer parameters PBL height, Monin–Obukhov length, convective velocity scale, roughness length and friction velocity15. We assumed skewed rather than Gaussian turbulence in the convective PBL. The FLEXPART-WRF has eight levels from 100 m to 10000 m, and 400 × 777 points, where in the output mesh where the particles are released. The outputs had spatial and temporal resolutions of 20 km and 6 h, respectively.

**Section 1.3 Moisture sources and sinks used**

The North Atlantic Ocean source (NATL; Sup. Fig. 1) is considered to be one of the main global oceanic sources that contributes moisture to continental precipitation17. This source contributes to several geographical areas, such as eastern North America, Central America, northern and central South America, Europe and northern Africa. Moreover, the NATL is an important oceanic contributor to the North and South American monsoon systems, as well as to the Atlantic Intertropical Convergence Zone (ITCZ)18 19. It shows marked seasonal behaviour; the moisture contribution increases during winter and decreases strongly in summer. Meanwhile, previous studies have not observed changes in its size and position17.

The Mediterranean Sea (MED; Sup. Fig. 1) plays an important role in its surrounding areas in terms of the transport of atmospheric moisture for precipitation. During the boreal winter, it supplies moisture that generates precipitation in continental areas located over Europe to the northeast; during the summer, it provides moisture to its surroundings in all directions and extending into northern Europe, northeast Africa and the Middle East17. The moisture contribution from the MED is higher in summer and relatively lower in autumn and winter17. In particular, the western MED contributes directly to rainfall over the Alpine region and the eastern Iberian Peninsula, and it plays an important role in transporting moisture to northern Africa. Furthermore, the central MED has a substantial impact on rainfall over the Hellenic Peninsula and islands and in the central part of North Africa, and the eastern MED influences the Middle East and Egypt20**.**

The Iberian Peninsula (IP; Sup. Fig. 1) is located in southwestern Europe and is surrounded by the Mediterranean Sea to the east and the Atlantic Ocean to the west. It is linked to the European continent in its northeastern corner. The precipitation regime north and west of the IP is strongly affected by the mean annual cycle of the Atlantic storm track and its variability, whereas in the interior and east of the IP, it is strongly affected by large-scale synoptic systems and convective precipitation21. The main moisture sources affecting the IP correspond to the tropical-subtropical region of North Atlantic Ocean and the Mediterranean Sea (a more local source).

**Supplementary Figure 1. Domains and target regions.** Domain configuration for WRF-ARW (red) and FLEXPART-WRF (green) simulations. The moisture target regions are shown in blue (MED; Mediterranean Sea), pink (IP; Iberian Peninsula) and dark violet (NATL; North Atlantic moisture source).

**Section 1.4 Evaluation of the used configurations**

The evaluations were conducted for the reference period (2010–2014) for the boreal seasonal periods from January to March (JFM), April to June (AMJ), July to September (JAS) and October to December (OND), corresponding to winter, spring, summer and autumn, respectively22, and for the annual scale.

First, the integrated water vapour transport (IVT) with the outputs of WRF-CESM2 and WRF-ERA5 (see Sup. Fig. 2) was evaluated using the following equations,

, (1)

, (2)

, (3)

where *g* is gravitational acceleration, *q* is specific humidity, *ps* is surface pressure, *p* is pressure at the top, and *u* and *v* are the zonal and meridional winds, respectively23, 24.

After verifying that the IVT field corresponded with the control experiments, the E-P fields for the moisture sources and sinks were evaluated (see Sup. Fig. 3, 4, 5). The statistics shown in Table 1 were used to evaluate the (E-P) patterns (see Sup. Fig. 6), where xi and yi are the simulated (FLEX-WRF) and control (FLEX-ERA5) values, respectively, *n* is the number of points and and are the mean values25.

**Table 1. Equations for the used statigraphs**

| **Statigraphs** | **Equation** |
| --- | --- |
| Absolute error (MAE) |  |
| Root mean square error (RMSE) |  |
| Pearson's correlation (R) |  |
| Bias (B) |  |

**Supplementary Figure 2. Comparison of IVT field between WRF-CESM2 and WRF-ERA5 |** IVT module (contours) and direction (arrows) for WRF-CESM2 (left column), WRF-ERA5 (central) and ERA5 (right) in the period 2010–2014 (kg m-1 s-1). The fields displayed from top to bottom correspond to winter, spring, summer, autumn and annual periods (JFM, AMJ, JAS, OND, and ANNUAL).

**Supplementary Figure 3. Moisture source fields for the Iberian Peninsula in the historical period |** Moisture sources fields for the Iberian Peninsula (in mm day-1) for FLEX-CESM2 (left) and FLEX-ERA5 (right), and the IVT field and its divergence from ERA5 (right, vectors in vectors in kg m-1 s-1 and coloured field in mm day-1, respectively) during the historical period (2010-2014). The fields displayed from top to bottom correspond to winter, spring, summer, autumn and annual periods (JFM, AMJ, JAS, OND, and ANNUAL).

**Supplementary Figure 4. Moisture sink fields for the Mediterranean source in the historical period |** Moisture sink fields for the Mediterranean Sea (in mm day-1) for FLEX-CESM2 (left) and FLEX-ERA5 (right), and the IVT field and its divergence from ERA5 (right, vectors in vectors in kg m-1 s-1 and coloured field in mm day-1, respectively) during the historical period (2010-2014). The fields displayed from top to bottom correspond to winter, spring, summer, autumn and annual periods (JFM, AMJ, JAS, OND, and ANNUAL).

**Supplementary Figure 5. Moisture sink fields for the North Atlantic source in the historical period. |** Moisture sink fields for the North Atlantic (in mm day-1) for FLEX-CESM2 (left) and FLEX-ERA5 (right), and the IVT field and its divergence from ERA5 (right, vectors in vectors in kg m-1 s-1 and coloured field in mm day-1, respectively) during the historical period (2010-2014). The fields displayed from top to bottom correspond to winter, spring, summer, autumn and annual periods (JFM, AMJ, JAS, OND, and ANNUAL).

**Supplementary Figure 6. Evaluation of FLEX-CESM2 configuration in the historical period. |** Statigraphs used for evaluating moisture sources and sinks for target regions: IP (red), MED (blue) and NATL (green). The graphs shown correspond to: R (a), MAE (b), BIAS (c), and RSME (d). Period: 2010–2014.

**Section 2. Supplementary figures for the manuscript**

**Supplementary figures and table for: Future projections for integrated water vapour transport (IVT) in the North Atlantic Ocean**

**Supplementary Figure 7. Comparison of IVT field between historical period and SSP5-8.5 scenario |** IVT module (coloured filled, in mm day-1) and direction (arrows, in kg m-1 s-1) for the historical reference period (left column, 2010–2014) and differences for the SSP5-8.5 scenario for the mid- and end 21st century (central, MC 2049–2053, and right, EC 2096–2100, respectively). The fields displayed from top to bottom correspond to winter, spring, summer, autumn and annual periods (JFM, AMJ, JAS, OND, and ANNUAL).

**Supplementary Figure 8.** **Comparison of IVT field between historical period and middle century SSP2-4.5 and SSP3-7.0 scenarios |** IVT module (coloured filled, in mm day-1) and direction (arrows, in kg m-1 s-1) for the historical reference period (left column, 2010–2014) and differences for SSP2-4.5 (central column), and SSP3-7.0 (right column) for the middle 21st century (2049–2053, MC). The fields displayed from top to bottom correspond to winter, spring, summer, autumn and annual periods (JFM, AMJ, JAS, OND, and ANNUAL).

**Supplementary Figure 9.** **Comparison of IVT field between historical period and the end of the century SSP2-4.5 and SSP3-7.0 scenarios |** IVT module (coloured filled, in mm day-1) and direction (arrows, in kg m-1 s-1) for the historical reference period (left column, 2010–2014) and differences for SSP2-4.5 (central column), and SSP3-7.0 (right column) for the end of the 21st century (2096–2100, EC). The fields displayed from top to bottom correspond to winter, spring, summer, autumn and annual periods (JFM, AMJ, JAS, OND, and ANNUAL).

**Supplementary Table 1: Mean percentage differences (%) for IVT with respect to the historical period considering SSP2-4.5, SSP3-7.0 and SSP5-8.5 scenarios |** The analyzed periods correspond to the middle (2049–2053, MC) and end of the century (2096–2100, EC). The analyzed seasons were winter, spring, summer, autumn and the annual period.

|  | Mid-century | | | End-century | | |
| --- | --- | --- | --- | --- | --- | --- |
| SSP2-4.5 | SSP3-7.0 | SSP5-8.5 | SSP2-4.5 | SSP3-7.0 | SSP5-8.5 |
| Winter | 4.0 | 9.1 | 7.3 | 16.2 | 18.5 | 28.3 |
| Spring | 2.2 | 1.1 | 4.1 | 12.7 | 10.0 | 23.8 |
| Summer | 13.4 | 6.5 | 5.9 | 14.8 | 21.4 | 33.9 |
| Autumn | 11.4 | 11.4 | 11.9 | 18.2 | 28.4 | 38.4 |
| Annual | 11.0 | 10.0 | 10.4 | 18.0 | 22.9 | 36.2 |

**Supplementary figures for : Changes in moisture sources for the Iberian Peninsula**

**Supplementary Figure 10. Future changes in moisture source fields for the Iberian Peninsula to the middle of the 21st century compared to the historical period |** Moisture sources fields for the IP for the historical reference period (2010–2014) and the differences under SSP2-4.5 and SSP3-7.0 scenarios for the middle 21st century (2049–2053, MC) expressed in mm day-1. The fields displayed from top to bottom correspond to winter, spring, summer, autumn and annual periods (JFM, AMJ, JAS, OND, and ANNUAL).

**Supplementary Figure 11. Future changes in moisture source fields for the IP to the end of century compared to the historical period |** Moisture sources fields for the IP for the historical reference period (2010–2014) and the differences under SSP2-4.5 and SSP3-7.0 scenarios for the end of the 21st century (2096–2100, EC) expressed in mm day-1. The fields displayed from top to bottom correspond to winter, spring, summer, autumn and annual periods (JFM, AMJ, JAS, OND, and ANNUAL).

**Supplementary figures for Changes in precipitation contribution from oceanic moisture sources**

**Supplementary Figure 12. Future changes in moisture sink fields for the Mediterranean source to the middle 21st century compared to the historical period |** Moisture sink fields for the MED source for historical reference period (2010–2014) and differences under SSP2-4.5 and SSP3-7.0 scenarios for the middle 21st century (2049–2053, MC) expressed in mm day-1. The fields displayed from top to bottom correspond to winter, spring, summer, autumn and annual periods (JFM, AMJ, JAS, OND, and ANNUAL).

**Supplementary Figure 13. Future changes in moisture sink fields for the Mediterranean source to the end of the 21st century compared to the historical period |** Moisture sink fields for the MED source for historical reference period (2010–2014) and differences under SSP2-4.5 and SSP3-7.0 scenarios for the end of 21st century (2096–2100, EC) expressed in mm day-1. The fields displayed from top to bottom correspond to winter, spring, summer, autumn and annual periods (JFM, AMJ, JAS, OND, and ANNUAL).

**Supplementary Figure 14. Future changes in moisture sink fields for the North Atlantic source to the middle 21st century compared to the historical period |** Moisture sink fields for the NATL source for historical reference period (2010–2014) and differences under SSP2-4.5 and SSP3-7.0 scenarios for the middle 21st century (2049–2053, MC) expressed in mm day-1. The fields displayed from top to bottom correspond to winter, spring, summer, autumn and annual periods (JFM, AMJ, JAS, OND, and ANNUAL).

**Supplementary Figure 15. Future changes in moisture sink fields for the North Atlantic source to the end of the 21st century compared to the historical period |** Moisture sink fields for the NATL source for historical reference period (2010–2014) and differences under SSP2-4.5 and SSP3-7.0 scenarios for the end of 21st century (2096–2100, EC) expressed in mm day-1. The fields displayed from top to bottom correspond to winter, spring, summer, autumn and annual periods (JFM, AMJ, JAS, OND, and ANNUAL).

**References**

1- Danabasoglu, G., Lamarque, J.‐F., Bacmeister, J., Bailey, D. A., DuVivier, A. K., Edwards, J., et al. The Community Earth System Model Version 2 (CESM2). *J. Adv. Model. Earth Syst.* **12,** e2019MS001916 (2020).

2- Simpson, I. R., Bacmeister, J., Neale, R. B., Hannay, C., Gettelman, A., Garcia, R. R., et al. An evaluation of the large‐scale atmospheric circulation and its variability in CESM2 and other CMIP models. *J. Geophys. Res.* **125,** e2020JD032835 (2020).

3- O’Neill B. C. et al. The scenario model intercomparison project (ScenarioMIP) for CMIP6. *Geosci. Model Dev.* **9**, 3461–3482 (2016)

4- Riahi K. et al. The shared socioeconomic pathways and their energy, land use, and greenhouse gas emissions implications: an overview. *Glob. Environ. Chang*e **42**, 153-168 (2017).

5- Hersbach, H., Bell, B., Berrisford, P., Hirahara, S., Horányi, A., Muñoz-Sabater, J., et al. The ERA5 global reanalysis. *Q. J. R. Meteorol. Soc.* **146,** 1999–2049 (2020).

6- Hong, S. Y., & Lim, J. O. J. The WRF single-moment 6-class microphysics scheme (WSM6). *Journal of the Korean Meteorological Society* **42,** 129–151 (2006).

7- Hong, S. Y., Noh, Y., & Dudhia, J. A new vertical diffusion package with an explicit treatment of entrainment processes. *Mon. Weather Rev.* **134,** 2318–2341 (2006).

8- Jimenez, P. A., Dudhia, J., Gonzalez-Rouco, J. F., Navarro, J., Montavez, J. P., & Garcia–Bustamante, E. A revised scheme for the WRF surface layer formulation. *Mon. Weather Rev.* **140,** 898–918 (2012).

9- Tewari, M., Chen, F., Wang, W., Dudhia, J., LeMone, M., Mitchell, K., et al. Implementation and verification of the unified Noah land surface model in the WRF model, 20th Conference on Weather Analysis and Forecasting/16th Conference on Numerical Weather Prediction, Seattle, WA (2004).

10- Iacono, M. J., Delamere, J. S., Mlawer, E. J., Shephard, M. W., Clough, S. A., & Collins, W. D. Radiative forcing by long–lived greenhouse gases: Calculations with the AER radiative transfer models. *J. Geophys. Res.* **113**, D13103 (2008).

11- Kain, J. S. The Kain–Fritsch Convective Parameterization: An Update. *J. Appl. Meteorol.* **43,** 170-181 (2004).

12- Miguez-Macho, G., Stenchikov, G. L., & Robock, A. Spectral nudging to eliminate the effects of domain position and geometry in regional climate model simulations. *J. Geophys. Res. Atmos.* **109,** 1–15 (2004).

13- Insua-Castro, D. & Miguez-Macho, G. A new moisture tagging capability in the Weather Research and Forecasting model: formulation, validation and application to the 2014 Great Lake-effect snowstorm. *Earth. Syst. Dyn.* **9,** 167–185 (2018).

14- Insua-Castro, D., Miguez-Macho, G. & Llasat, M. C. Local and remote moisture sources for extreme precipitation: a study of the two catastrophic 1982 western Mediterranean episodes. *Hydrol. Earth Syst. Sci.* **23**, 3885–3900 (2019).

15- Brioude, J., et al. The Lagrangian particle dispersion model FLEXPART-WRF version 3.1. *Geosci. Model Dev.***6,** 1889–1904 (2013).

16- Hanna, S. R. Applications in air pollution modeling, in: Atmospheric Turbulence and Air Pollution Modelling. Reidel Publishing Company, Dordrecht, Holland, 275–310 (1982).

17- Gimeno, L., Drumond, A., Nieto, R., Trigo, R. M. & Stohl, A. On the origin of continental precipitation. *Geophys. Res. Lett.* **37,** L13804 (2010).

18- Castillo, R., Nieto, R., Drumond, A. & Gimeno, L. Estimating the Temporal Domain when the Discount of the Net Evaporation Term Affects the Resulting Net Precipitation Pattern in the Moisture Budget Using a 3-D Lagrangian Approach. *PLoS ONE* **9,** e99046 (2014).

19- Drumond, A., Nieto, R., & Gimeno, L. On the contribution of the Tropical Western Hemisphere Warm Pool source of moisture to the Northern Hemisphere precipitation through a Lagrangian approach, *J. Geophys.* **116,** D00Q04 (2011).

20- Nieto, R., Gimeno, L., Drumond, A. & Hernandez, E. A Lagrangian identification of the main moisture sources and sinks affecting the Mediterranean area. *WSEAS Trans. Environ. Dev.* ***6,*** 365-374 (2010).

21- Trigo, I. F., Davies, T. D. & Bigg, G. R. Objective climatology of cyclones in the Mediterranean region. *J. Climate* **12,** 1685–1696 (1999).

22- Gimeno, L., Nieto, R., Trigo, R., Vicente-Serrano, S.M. & López-Moreno, J. I. Where does the Iberian Peninsula moisture comme from? An answer based on a Lagrangian approach. *J. Hydrometeorol.* **11,** 421-336 (2010).

23- Lavers, D. A., Villarini, G., Allan, R. P., Wood, E. F., & Wade, A. J. The detection of atmospheric rivers in atmospheric reanalyses and their links to British winter floods and the large-scale climatic circulation. *J. Geophys. Res.* **117,** D20106 (2012).

24- Lavers, D. A., Villarini, G., Allan, R. P., Wood, E. F., & Wade, A. J. The detection of atmospheric rivers in atmospheric reanalyses and their links to British winter floods and the large-scale climatic circulation. *J. Geophys. Res.* **117**, D20106 (2012).

25- Brown B, Ebert E, Fowler T, Gilleland E, Kucera P, Wilson L Verification methods for tropical cyclone forecasts. WMO Technical Document WWRP 2013-7, 7(November) (2013).
